# Supplementary material for: Comparing the Clinical Characteristics and Mortality of Residential and Non-Residential Older People with COVID-19: Retrospective Observational Study
Source: MDPI journal article supplement (doi:10.3390/ijerph19010483), 2022-01-02
Supplement: s1 [file s1]

## Supplementary information

**Table S1.** Code lists for EHR attributable to COVID-19 disease.

| ICD-10-CM | Description                                                               |
|-----------|---------------------------------------------------------------------------|
| B34.2     | Coronavirus infection, unspecified                                        |
| B97.29    | Other coronavirus as the cause of diseases classified elsewhere           |
| B97.89    | Other viral agents as the cause of diseases classified elsewhere          |
| B34.9     | Viral infection, unspecified                                              |
| B97.21    | SARS-associated coronavirus as the cause of diseases classified elsewhere |
